# Supplementary material for: SARS-CoV-2 Nsp15 suppresses type I interferon production by inhibiting IRF3 phosphorylation and nuclear translocation
Source: PubMed Central journal article supplement (PMC10480782; doi:10.1016/j.isci.2023.107705), 2023-08-23
Supplement: mmc1.pdf [file mmc1.pdf]

**Supplemental information**

**SARS-CoV-2 Nsp15 suppresses type I  
interferon production by inhibiting IRF3  
phosphorylation and nuclear translocation**

**Dianqi Zhang, Likai Ji, Xu Chen, Yumin He, Yijie Sun, Li Ji, Tiancheng Zhang, Quan Shen, Xiaochun Wang, Yan Wang, Shixing Yang, Wen Zhang, and Chenglin Zhou**

This file includes Figure S1 to S4, and Table S1  
**Supplementary Figure Legends**

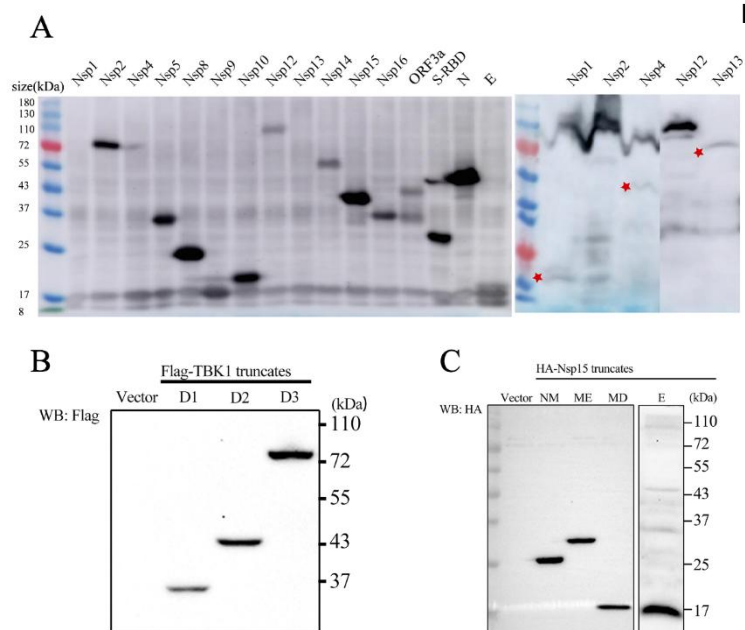

**Figure S1. Expression of related proteins. Related to Figure 1 and Figure 5.**

(A) HEK-293T cells were transfected with the indicated plasmid. After 24 h post-transfection, cells were harvested and immunoblotted with HA-tagged antibodies. (B) Expression of TBK1 truncated proteins. N-terminally Flag-tagged truncated proteins were expressed in HEK-293T cells for 24 h and analyzed by Western blot using the anti-Flag antibody. (C) Expression of Nsp15 truncated proteins. N-terminally HA-tagged truncated proteins were expressed in HEK-293T cells for 24 h and immunoblotted with the anti-HA antibody.

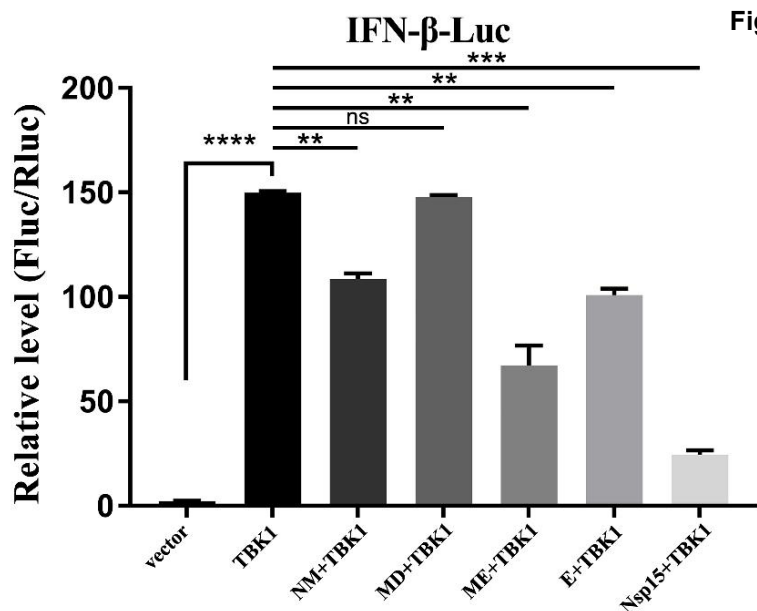

**Figure S2. Screening of SARS-CoV-2 Nsp15 truncated proteins interferon antagonists. Related to Figure 5.**

IFN- $\beta$ -luc reporter plasmids were co-transfected with pRL-TK plasmids, TBK1 expression

vector and SARS-CoV-2 Nsp15 or its truncated protein plasmids into HEK-293T cells for 24 h, respectively. Cells were then lysed for dual-luciferase assay. The experiment was done at least three times, and error bars indicate SDs from three independent experiments, ns represents non-significant, \*  $p < 0.05$ , \*\*  $p < 0.01$ , \*\*\*  $p < 0.001$ , two-tailed Student's t-test.

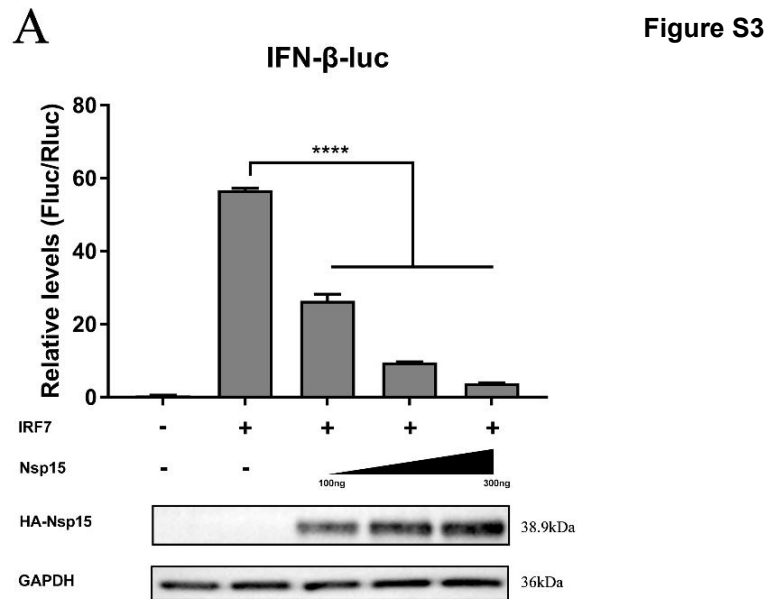

**Figure S3. SARS-CoV-2 Nsp15 inhibits IRF7-induced IFN-I activation. Related to Figure 3.**

(A) HEK-293T cells were co-transfected with pIFN- $\beta$ -Luc, pRL-TK, and with increasing amounts of Nsp15-expressing plasmid, together with plasmids expressing IRF7. Equivalent amounts of lysates were also used for western blot analysis. All experiments were performed at least three times. Error bars indicate SDs from three independent experiments, ns represents non-significant, \*  $p < 0.05$ , \*\*  $p < 0.01$ , \*\*\*  $p < 0.001$ , one-way ANOVA.

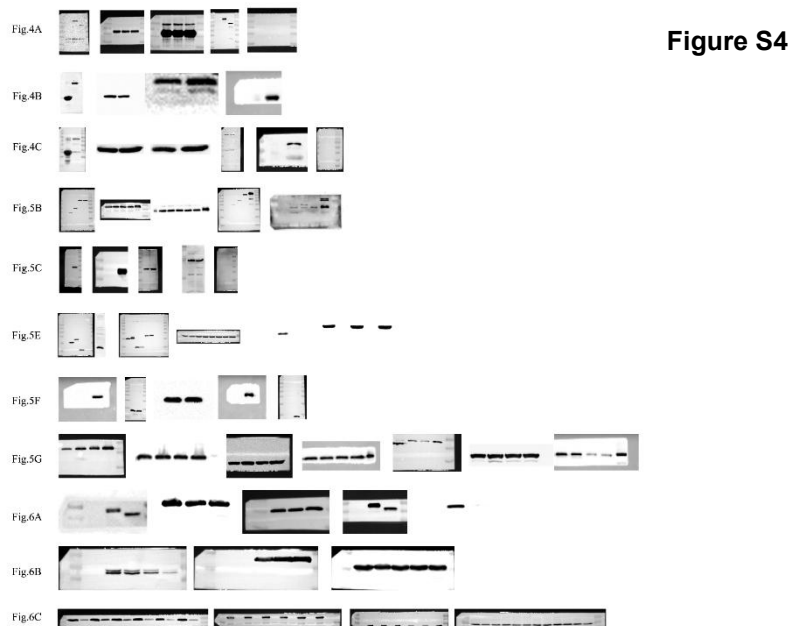

**Figure S4. Western blot experiment raw membrane data. Related to Figure 4-6.**

**Table S1. Sequences of primer.**

| Gene name | Gene ID      | Primers          | sequence (5'-3')          |
|-----------|--------------|------------------|---------------------------|
| KPNA1     | NM_002264    | Flag-KPNA1-PF    | ATGACCACCCCAGGAAAAGAGA    |
| KPNA1     | NM_002264    | Flag-KPNA1-PR    | AAGCTGGAAACCTTCCATAGGA    |
| KPNA2     | NM_001320611 | Flag-KPNA2-PF    | ATGTCCACCAACGAGAATGC      |
| KPNA2     | NM_001320611 | Flag-KPNA2-PR    | AAAGTTAAAGGTCCCAGGAGCC    |
| NuTF2     | NM_001322038 | Flag-NuTF2-PF    | ATGGGAGACAAGCCAATTTGGGA   |
| NuTF2     | NM_001322038 | Flag-NuTF2-PR    | GCCAAAGTTGTGCAGGGCGA      |
| RIG-I     | NM_014314    | Flag-RIG-I-PF    | ATGACCACCGAGCAGCGA        |
| RIG-I     | NM_014314    | Flag-RIG-I-PR    | TCATTTGGACATTTCTGCTGGA    |
| MDA5      | NM_022168    | Flag-MDA5-PF     | ATGTCGAATGGGTATTCCAC      |
| MDA5      | NM_022168    | Flag-MDA5-PR     | CTAATCCTCATCACTAAATAAAC   |
| MAVS      | NM_020746    | Flag-MAVS-PF     | ATGCCGTTTGCTGAAGACAAGA    |
| MAVS      | NM_020746    | Flag-MAVS-PR     | CTAGTGCAGACGCCGC          |
| TBK1      | NM_013254    | Flag-TBK1-PF     | ATGCAGAGCACTTCTAATCATC    |
| TBK1      | NM_013254    | Flag-TBK1-PR     | CTAAAGACAGTCAACGTTG       |
| IRF3      | NM_001571    | Flag-IRF3-PF     | ATGGGAACCCCAAAGCCAC       |
| IRF3      | NM_001571    | Flag-IRF3-PR     | CTAGCTCTCCCCAGGGCCCT      |
| RNF41     | NM_001132802 | Flag-RNF41-PF    | ATGGGGTATGATGTAACCCGTT    |
| RNF41     | NM_001132802 | Flag-RNF41-PR    | CTATATCTCTTCCACACCAT      |
| TBK1-K    | N/A          | Flag-TBK1-K-PF   | ATGCAGAGCACTTCTAATCATCT   |
| TBK1-K    | N/A          | Flag-TBK1-K-PR   | CTAAAAAACTGGTCAAAACCCCA   |
| TBK1-KU   | N/A          | Flag-TBK1-KU-PF  | ATGCAGAGCACTTCTAATCATCT   |
| TBK1-KU   | N/A          | Flag-TBK1-KU-PR  | CTATACTACAAATATAGGGTT     |
| TBK1-KUS  | N/A          | Flag-TBK1-KUS-PF | ATGCAGAGCACTTCTAATCATCT   |
| TBK1-KUS  | N/A          | Flag-TBK1-KUS-PR | CTAATGTTTGATTCCACTGGA     |
| TBK1-US   | N/A          | Flag-TBK1-US-PF  | ATGGCAGAACTAGTGATATACTTCA |
| TBK1-US   | N/A          | Flag-TBK1-US-PR  | CTAAAGACAGTCAACGTTG       |
